# Supplementary material for: An Imidazo[1,5-a]pyridine Benzopyrylium-Based NIR Fluorescent Probe with Ultra-Large Stokes Shifts for Monitoring SO2
Source: MDPI journal article supplement (doi:10.3390/molecules28020515), 2023-01-05
Supplement: s1 [file s1]

**Imidazo[1,5-a]pyridine-benzopyrylium based NIR fluorescent probe  
for monitoring SO<sub>2</sub> with ultralarge Stokes shifts**

*Renle Cui<sup>1</sup>, Caihong Liu<sup>1</sup>, Ping Zhang<sup>1</sup>, Kun Qin<sup>\*</sup>, Yanqing Ge<sup>\*</sup>*

Department of Chemistry and Pharmaceutical Engineering, Shandong First Medical University & Shandong Academy of Medical Sciences, No. 619, Changcheng Road, Taian, Shandong 271016, China. E-mail: yqge@sdfmu.edu.cn

<sup>1</sup> equal contribution

## Instruments

$^1\text{H}$  NMR and  $^{13}\text{C}$  NMR spectra were measured on a Bruker Avance 400 (400 MHz) spectrometer ( $\text{CDCl}_3$  or  $\text{DMSO-d}_6$  as solvent and tetramethylsilane (TMS) as an internal standard). High-resolution mass spectra (HRMS) were measured on an Agilent 6546 LC/Q-TOF spectrometer using electron spray ionization (ESI) technique. Chromatographic separations were done by column chromatography using 200-300 mesh silica gel. UV-vis spectra and fluorescence spectra were recorded on a UV-2600 spectrometer (Shimadzu) and FS-5 luminescence spectrophotometer (Edinburg) at room temperature and Fluorescence imaging was obtained by Olympus FV 3000.

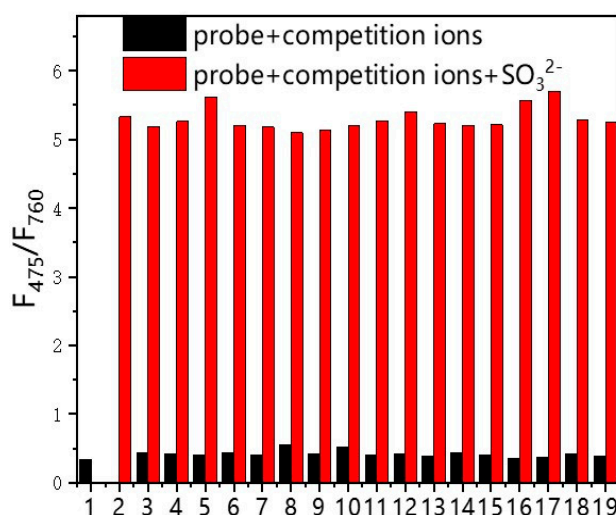

**Figure S1.** Ratiometric fluorescence responses  $F_{475}/F_{760}$  of **IPB-RL-1** upon the addition of 10 equiv.  $\text{SO}_3^{2-}$  in the presence of 100 eq. background ions (1, probe; 2,  $\text{SO}_4^{2-}$ ; 3,  $\text{Br}^-$ ; 4,  $\text{ACO}^-$ ; 5,  $\text{Cl}^-$ ; 6,  $\text{ClO}^-$ ; 7, Cys; 8,  $\text{ClO}_4^-$ ; 9, GSH; 10,  $\text{F}^-$ ; 11,  $\text{H}_2\text{PO}_4^-$ ; 12,  $\text{HCO}_3^-$ ; 13,  $\text{HPO}_4^{2-}$ ; 14,  $\text{HS}^-$ ; 15,  $\text{I}^-$ ; 16,  $\text{NO}_2^-$ ; 17,  $\text{NO}_3^-$ ; 18,  $\text{S}_2\text{O}_8^{2-}$ ; 19,  $\text{SO}_3^{2-}$ ).

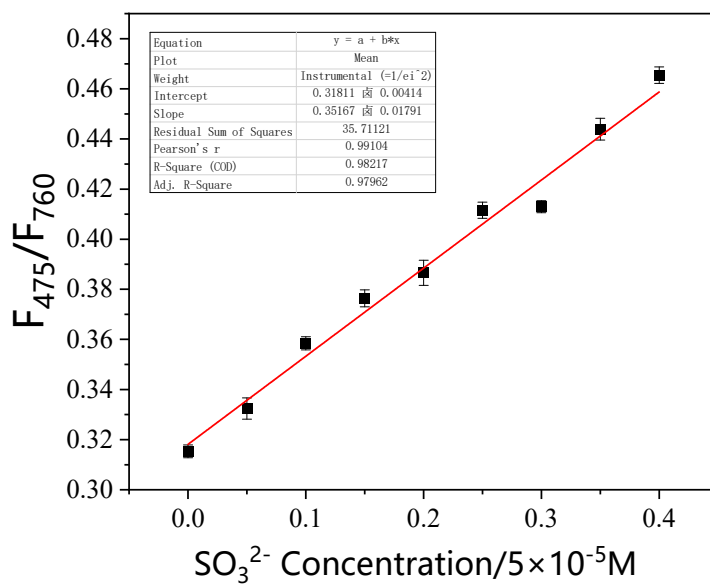

**Figure S2.** Relationship between fluorescence intensity ratio ( $F_{475}/F_{760}$ ) and  $\text{SO}_3^{2-}$  concentration.

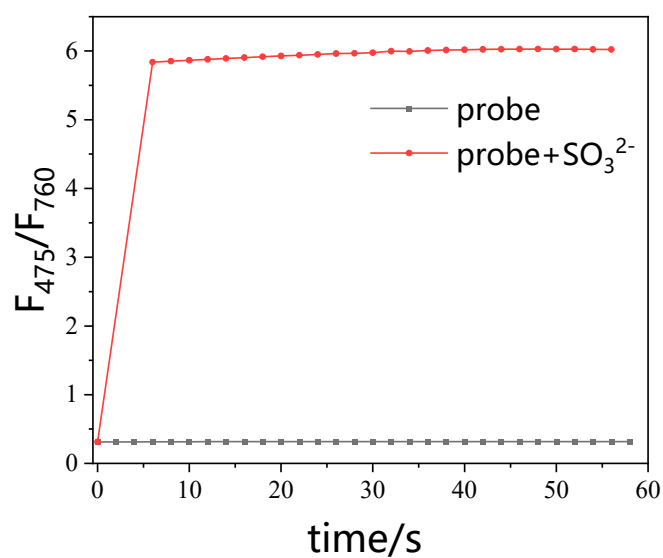

**Figure S3.** Time dependent increase of IPB-RL-1 fluorescence intensities after addition of  $\text{SO}_3^{2-}$ .

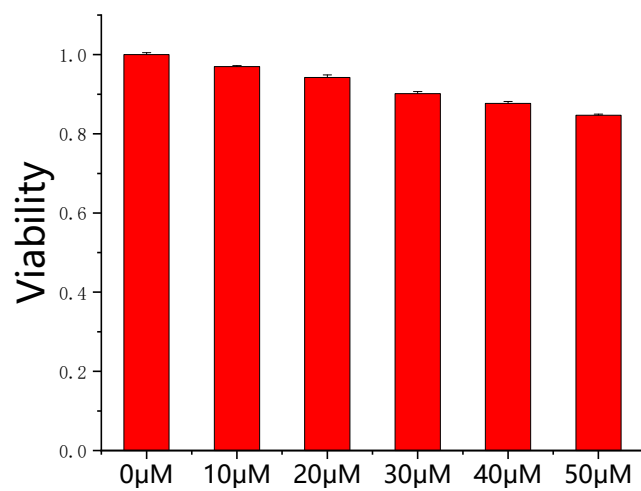

**Figure S4.** Cytotoxicity of **IPB-RL-1**.

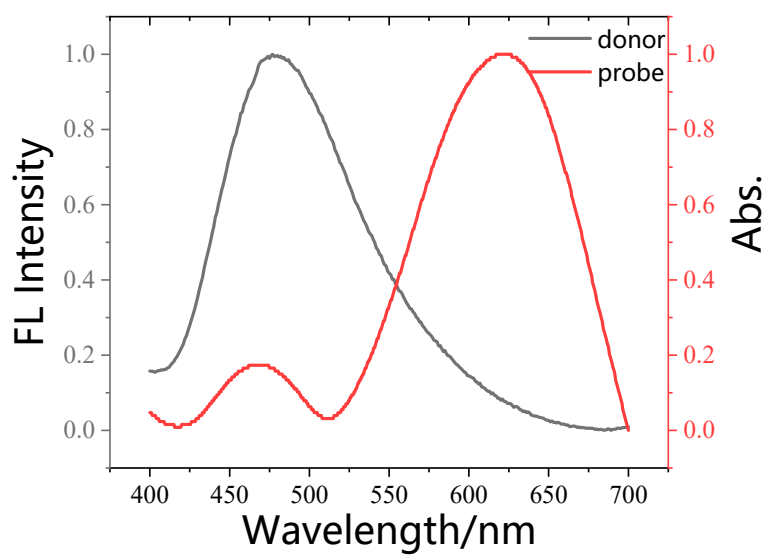

**Figure S5.** Normalized emission spectra of donor (compound **3**) and normalized absorption spectra of **IPB-RL-1**.

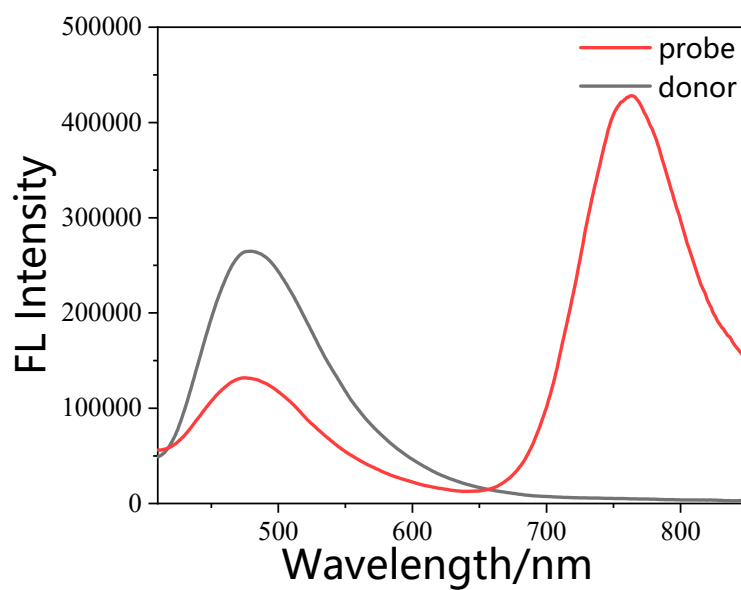

**Figure S6.** The emission spectrum of probe **IPB-RL-1** and donor.

$$\text{Energy transfer efficiency} = 1 - F_{DA}/F_D = 51\%$$

Where  $F_{DA}$  is the fluorescence intensity of the donor in the presence of the acceptor,

$F_D$  is fluorescence intensity of the donor in the absence of the acceptor.

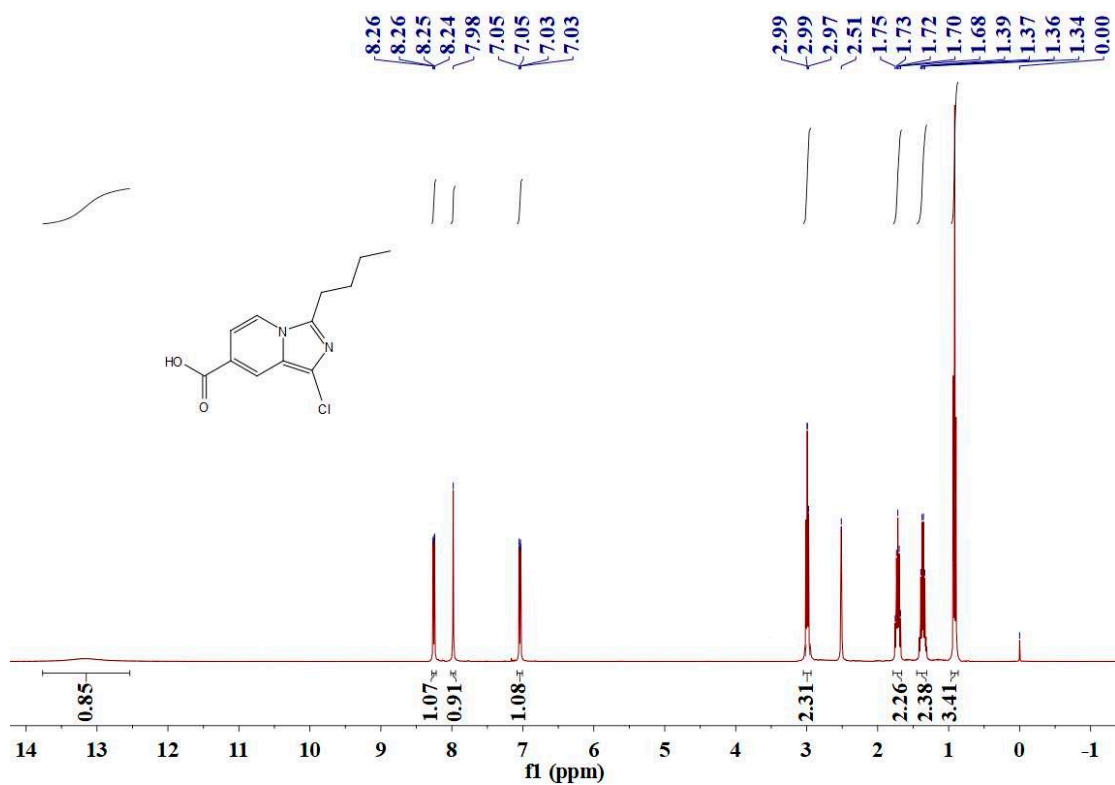

Figure S7. <sup>1</sup>H NMR of compound 1.

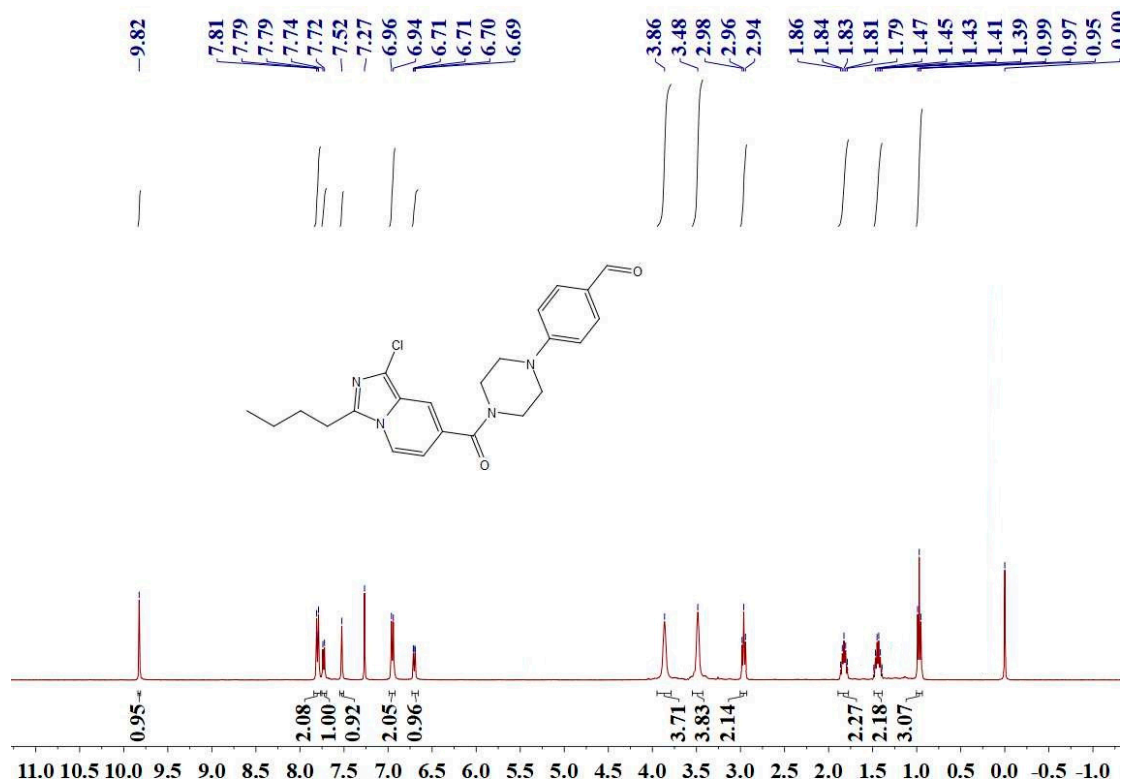

Figure S8. <sup>1</sup>H NMR of compound 3.

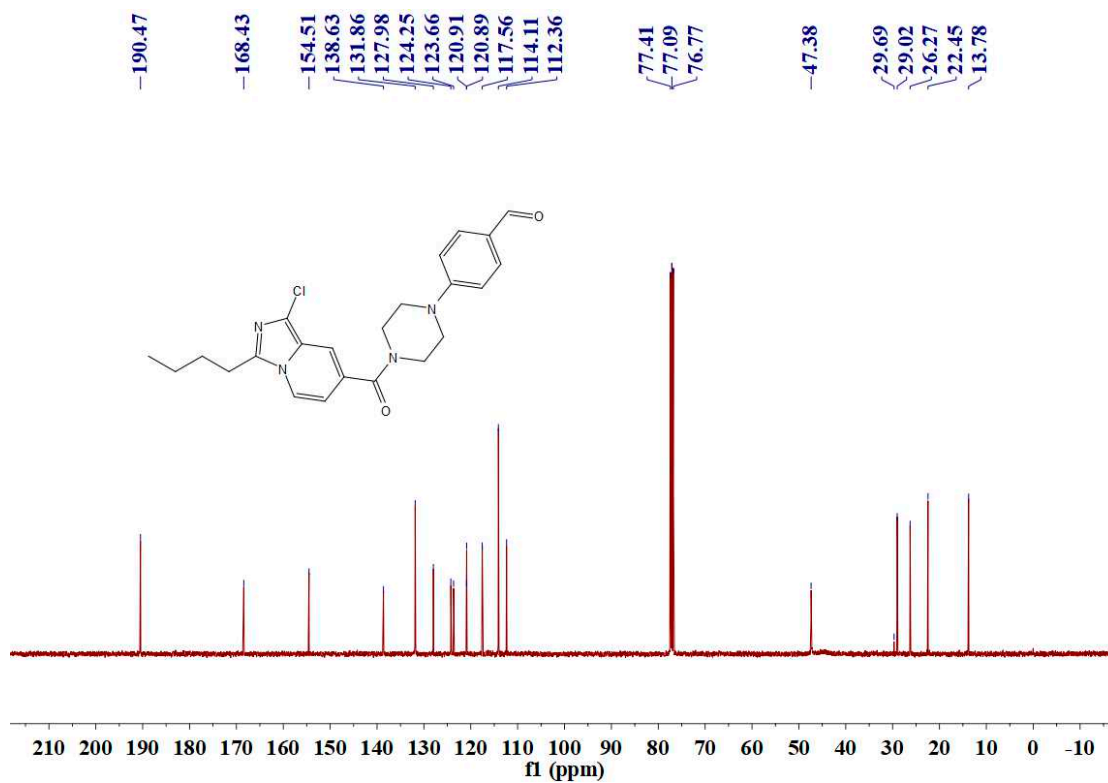

Figure S9. <sup>13</sup>C NMR of compound 3.

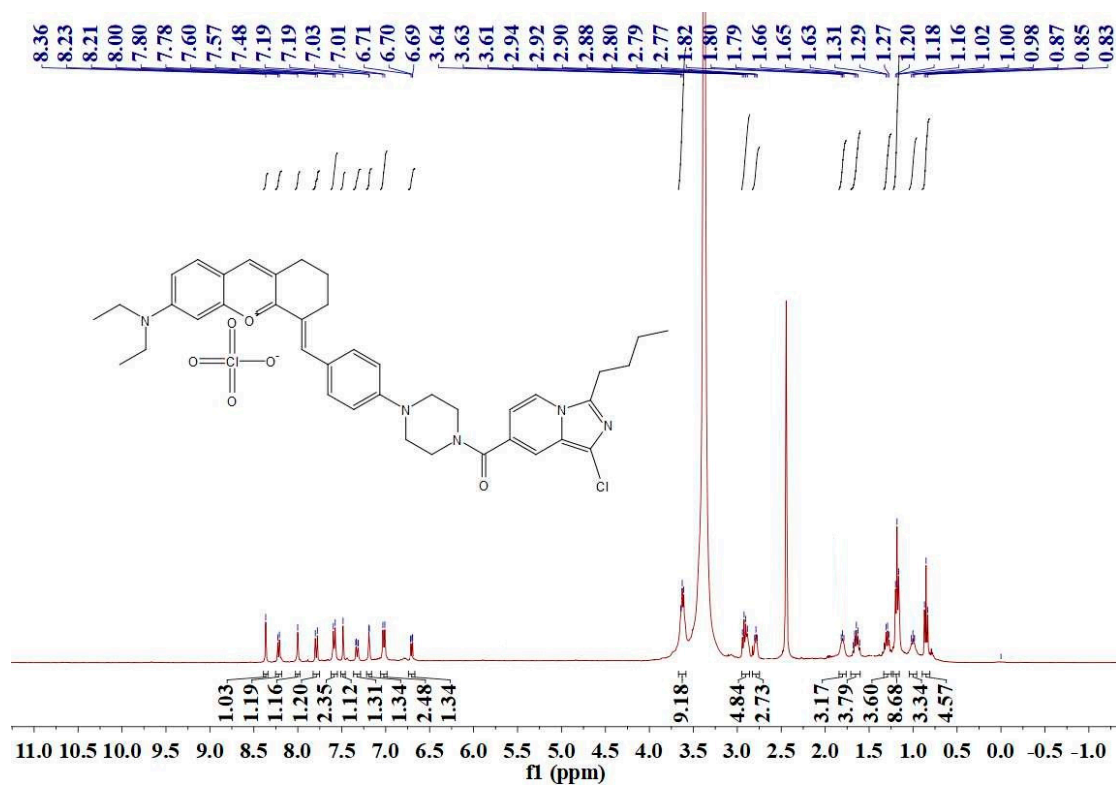

Figure S10. <sup>1</sup>H NMR of probe IPB-RL-1.





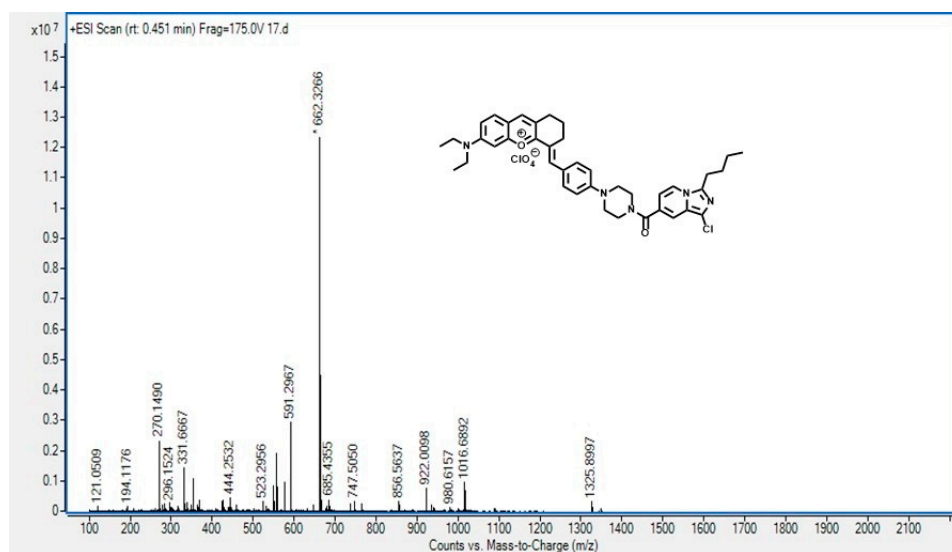

**Figure S13.** HRMS of probe **IPB-RL-1**.

**Table S1.** Comparison with other probes.

| Probe                                                                               | $\lambda_{\text{ex}}$<br>(nm) | Stokes<br>shift<br>(nm) | LOD<br>(nM) | response<br>time | Ref. |
|-------------------------------------------------------------------------------------|-------------------------------|-------------------------|-------------|------------------|------|
| 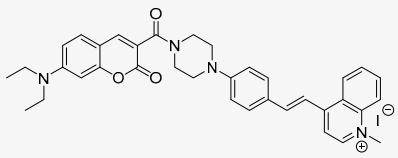 | 420                           | 251                     | 17          | 50min            | 31   |
|  | 410                           | 115                     | 98.1        | 150s             | 32   |
|  | 390                           | 200                     | 69          |                  | 33   |

|                                                                                     |     |     |           |       |    |
|-------------------------------------------------------------------------------------|-----|-----|-----------|-------|----|
| 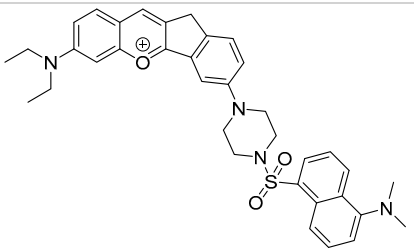   | 380 | 255 | 1.08      | 22s   | 34 |
|    | 410 | 225 | 1.08      | 22s   | 34 |
|    | 345 | 250 | 68        | 2min  | 35 |
|   | 420 | 160 | ×         | 36min | 36 |
|  | 380 | 198 | 26.7      | 60min | 28 |
|  | 395 | 132 | 100       | 50min | 25 |
|  | 405 | 195 | 6600<br>0 | 5min  | 11 |

|                                                                                     |     |     |      |       |    |
|-------------------------------------------------------------------------------------|-----|-----|------|-------|----|
| 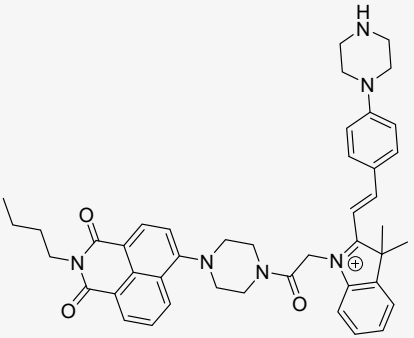   | 410 | 180 | 61.2 | 30s   | 37 |
|    | 405 | 206 | 58.6 | 30s   | 38 |
|   | 640 | 170 | 3200 | 80min | 39 |
|  | 390 | 240 | 7.48 | 8s    | 16 |
|  | 380 | 203 | 12.6 | 35s   | 40 |
|  | 370 | 80  | 26   | 20s   | 41 |
|  | 405 | 230 | 78   | 15s   | 42 |
|  | 470 | 224 | 47   | 10s   | 43 |

|                                                                                     |     |     |       |       |    |
|-------------------------------------------------------------------------------------|-----|-----|-------|-------|----|
| 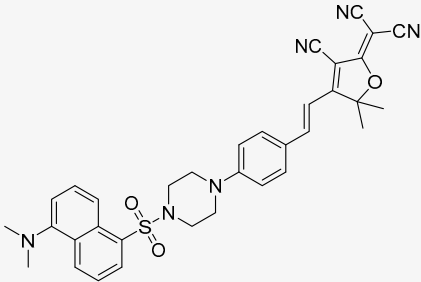   | 390 | 155 | 66    | 60min | 22 |
|    | 430 | 159 | 12.85 | 3min  | 44 |
|    | 425 | 215 | 1210  | 5s    | 12 |
|   | 400 | 48  | 292   | 1min  | 45 |
|  | 345 | 296 | 17    | 20min | 46 |
|  | 420 | 200 | 15.6  | 13min | 47 |
|  | 405 | 233 | 160   | 40s   | 20 |
|  | 345 | 245 | 16    | 2min  | 48 |

|                                                                                     |     |     |           |       |    |
|-------------------------------------------------------------------------------------|-----|-----|-----------|-------|----|
| 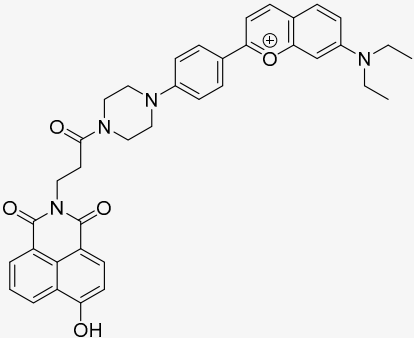   | 405 | 229 | 47        | 8min  | 49 |
|    | 420 | 210 | 17.7      | 1min  | 19 |
|   | 440 | 170 | 16.2      | 12min | 50 |
|  | 410 | 172 | 100       | 2min  | 51 |
|  | 470 | 180 | 17        | 20s   | 21 |
|  | 380 | 260 | 62        | 2min  | 52 |
|  | 410 | 205 | 2600<br>0 | 10min | 23 |

|  |     |     |      |       |    |
|--|-----|-----|------|-------|----|
|  | 415 | 235 | 5910 | 1min  | 53 |
|  | 380 | 196 | 70   | 20min | 54 |
|  | 378 | 122 | 240  | 10min | 17 |
|  | 405 | 239 | 39   | 3min  | 55 |
|  | 380 | 200 | 130  | 3min  | 56 |
|  | 380 | 210 | 50   | 3min  | 57 |
|  | 430 | 200 | 2900 | 4min  | 58 |
|  | 450 | 204 | 512  | 10min | 59 |

|                                                                                   |     |     |     |    |           |
|-----------------------------------------------------------------------------------|-----|-----|-----|----|-----------|
| 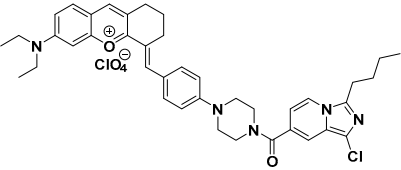 | 300 | 460 | 980 | 6s | This work |
|-----------------------------------------------------------------------------------|-----|-----|-----|----|-----------|

## References

31. Yan, Y.; He, X.; Miao, J.; Zhao, B. A near-infrared and mitochondria-targeted fluorescence probe for ratiometric monitoring of sulfur dioxide derivatives in living cells. *J. Mater. Chem. B.* **2019**, *7*, 6585–6591. <https://doi.org/10.1039/C9TB01686D>.
32. Shen, R.; Qian, Y. A novel ratiometric fluorescent probe for specific detection of  $\text{HSO}_3^-$  at nanomolar level through 1,4-Michael addition. *J. Photochem. Photobiol. A.* **2020**, *387*, 112110. <https://doi.org/10.1016/j.jphotochem.2019.112110>.
33. Wu, W.; Ma, H.; Huang, M.; Miao, J.; Zhao, B. Mitochondria-targeted ratiometric fluorescent probe based on FRET for bisulfite. *Sens. Actuators, B.* **2017**, *241*, 239–244. <https://doi.org/10.1016/j.snb.2016.10.028>.
34. Yang, D.; Ning, J.; Wu, X.; Yao, W.; Shi, H.; Miao, J.; Zhao, B.; Lin, Z. Ratiometric fluorescence sensing of endogenous sulfur dioxide derivatives: bio-imaging application in lipid droplets. *Dyes Pigm.* **2021**, *192*, 109457. <https://doi.org/10.1016/j.dyepig.2021.109457>.
35. Li, D.; Wang, Z.; Cui, J.; Wang, X.; Miao, J.; Zhao, B. A new fluorescent probe for colorimetric and ratiometric detection of sulfur dioxide derivatives in liver cancer cells. *Sci. Rep.* **2017**, *7*, 45294. <https://doi.org/10.1038/srep45294>.
36. Zhao, J.; Huang, L.; Yan, M.; Qu, Y.; Feng, H.; Sun, Y. A lysosome specific ratiometric fluorescent probe for detection of bisulfite ion based on hybrid coumarin-benzimidazolium compounds. *Phosphorus. Sulfur.* **2021**, *196*, 321–327. <https://doi.org/10.1080/10426507.2020.1835904>.
37. Shen, R.; Qian, Y. A mitochondria-oriented fluorescent probe for ultrafast and ratiometric detection of  $\text{HSO}_3^-$  based on naphthalimide–hemicyanine. *New J.*

- Chem.* **2019**, 43, 7606–7612. <https://doi.org/10.1039/C9NJ01467E>.
38. Wang, Y.; Meng, Q.; Zhang, R.; Jia, H.; Wang, C.; Zhang, Z. A mitochondria-targeted ratiometric probe for the fluorescent and colorimetric detection of SO<sub>2</sub> derivatives in live cells. *J. Lumin.* **2017**, 192, 297–302. <https://doi.org/10.1016/j.jlumin.2017.06.033>.
  39. Liu, K.; Chen, Y.; Sun, H.; Wang, S.; Kong, F. Construction of a novel near-infrared fluorescent probe with multiple fluorescence emission and its application for SO<sub>2</sub> derivative detection in cells and living zebrafish. *J. Mater. Chem. B.* **2018**, 6, 7060–7065. <https://doi.org/10.1039/C8TB02030B>.
  40. Yang, D.; He, X.; Wu, X.; Shi, H.; Miao, J.; Zhao, B.; Lin, Z. A novel mitochondria-targeted ratiometric fluorescent probe for endogenous sulfur dioxide derivatives as a cancer-detecting tool. *J. Mater. Chem. B.* **2020**, 8, 5722–5728. <https://doi.org/10.1039/D0TB00149J>.
  41. Yin, G.; Gan, Y.; Yu, T.; Niu, T.; Yin, P.; Chen, H.; Zhang, Y.; Li, H.; Yao, S. A dual-emission and mitochondria-targeted fluorescent probe for rapid detection of SO<sub>2</sub> derivatives and its imaging in living cells. *Talanta.* **2019**, 191, 428–434. <https://doi.org/10.1016/j.talanta.2018.08.059>.
  42. Huang, Y.; Zhang, Y.; Huo, F.; Yin, C. FRET-dependent single/two-channel switch endowing a dual detection for sulfite and its organelle targeting applications. *Dyes Pigm.* **2021**, 184, 108869. <https://doi.org/10.1016/j.dyepig.2020.108869>.
  43. Wang, M.; Liu, Q.; Sun, X.; Zheng, S.; Ma, Y.; Wang, Y.; Yan, M.; Lu, Z.; Fan, C.; Lin, W. Ratiometric and reversible detection of endogenous SO<sub>2</sub> and HCHO in living cells and mice by a near-infrared and dual-emission fluorescent probe. *Sensors Actuators B: Chem.* **2021**, 335, 129649. <https://doi.org/10.1016/j.snb.2021.129649>.
  44. Zhang, L.; Wang, Z.; Liu, J.; Miao, J.; Zhao, B. A rational design of ratiometric fluorescent probes based on new ICT/FRET platform and imaging of endogenous sulfite in living cells. *Sens. Actuators, B.* **2017**, 253, 19–26. <https://doi.org/10.1016/j.snb.2017.06.072>.



45. Song, G.; Luo, J.; Xing, X.; Ma, H.; Yang, D.; Cao, X.; Ge, Y.; Zhao, B. A ratiometric fluorescence probe for rapid detection of mitochondrial SO<sub>2</sub> derivatives. *New J. Chem.* **2018**, 42, 3063–3068. <https://doi.org/10.1039/C7NJ04021K>.
46. Li, D.; Han, X.; Yan, Z.; Cui, Y.; Miao, J.; Zhao, B. A far-red ratiometric fluorescent probe for SO<sub>2</sub> derivatives based on the ESIPT enhanced FRET platform with improved performance. *Dyes Pigm.* **2018**, 151, 95–101. <https://doi.org/10.1016/j.dyepig.2017.12.056>.
47. Yan, Y.; Wu, Q.; Che, Q.; Ding, M.; Xu, M.; Miao, J.; Zhao, B.; Lin, Z. A mitochondria-targeted fluorescent probe for the detection of endogenous SO<sub>2</sub> derivatives in living cells. *Analyst.* **2020**, 145, 2937–2944. <https://doi.org/10.1039/D0AN00086H>.
48. Li, D.; Wang, Z.; Su, H.; Miao, J.; Zhao, B. Fluorescence detection of endogenous bisulfite in liver cancer cells using an effective ESIPT enhanced FRET platform. *Chem. Commun.* **2017**, 53, 577–580. <https://doi.org/10.1039/C6CC06459K>.
49. Lu, Y.; Dong, B.; Song, W.; Sun, Y.; Mehmood, A.; Lin, W. A mitochondria-targeting ratiometric fluorescent probe for the detection of sulfur dioxide in living cells. *New J. Chem.* **2020**, 44, 11988–11992. <https://doi.org/10.1039/D0NJ02461A>.
50. Li, Z.; Cui, X.; Yan, Y.; Che, Q.; Miao, J.; Zhao, B.; Lin, Z. A novel endoplasmic reticulum-targeted ratiometric fluorescent probe based on FRET for the detection of SO<sub>2</sub> derivatives. *Dyes Pigm.* **2021**, 188, 109180. <https://doi.org/10.1016/j.dyepig.2021.109180>.
51. Li, D.; Wang, Z.; Cao, X.; Cui, J.; Wang, X.; Cui, H.; Miao, J.; Zhao, B. A mitochondria-targeted fluorescent probe for ratiometric detection of endogenous sulfur dioxide derivatives in cancer cells. *Chem. Commun.* **2016**, 52, 2760–2763. <https://doi.org/10.1039/C5CC09092J>.
52. Zhang, G.; Ji, R.; Kong, X.; Ning, F.; Liu, A.; Cui, J.; Ge, Y. A FRET based ratiometric fluorescent probe for detection of sulfite in food. *RSC Adv.* **2019**, 9,

- 1147–1150. <https://doi.org/10.1039/C8RA08967A>.
53. Yang, Y.; He, L.; Xu, K.; Lin, W. Development of a mitochondria-targeted fluorescent probe for the ratiometric visualization of sulfur dioxide in living cells and zebrafish. *Anal. Methods*. **2019**, *11*, 3931–3935. <https://doi.org/10.1039/C9AY01211G>.
54. Xu, Z.; Chen, Z.; Liu, A.; Ji, R.; Cao, X.; Ge, Y. A ratiometric fluorescent probe for detection of exogenous mitochondrial SO<sub>2</sub> based on a FRET mechanism. *RSC Adv*. **2019**, *9*, 8943–8948. <https://doi.org/10.1039/C8RA10328C>.
55. Yang, X.; Zhou, Y.; Zhang, X.; Yang, S.; Chen, Y.; Guo, J.; Li, X.; Qing, Z.; Yang, R. A TP-FRET-based two-photon fluorescent probe for ratiometric visualization of endogenous sulfur dioxide derivatives in mitochondria of living cells and tissues. *Chem. Commun.* **2016**, *52*, 10289–10292. <https://doi.org/10.1039/C6CC05254A>.
56. Li, T.; Huo, F.; Chao, J.; Yin, C. Independent bi-reversible reactions and regulable FRET efficiency achieving real-time visualization of Cys metabolizing into SO<sub>2</sub>. *Chem. Commun.* **2020**, *56*, 11453–11456. <https://doi.org/10.1039/D0CC04839A>.
57. Chen, X.; Chen, Q.; He, D.; Yang, S.; Yang, Y.; Qian, J.; Long, L.; Wang, K. Mitochondria targeted and immobilized ratiometric NIR fluorescent probe for investigating SO<sub>2</sub> phytotoxicity in plant mitochondria. *Sens. Actuators, B*. **2022**, *370*, 132433. <https://doi.org/10.1016/j.snb.2022.132433>.
